# Supplementary material for: Metal β-diketonate complexes as highly efficient catalysts for chemical fixation of CO2 into cyclic carbonates under mild conditions
Source: Royal Society of Chemistry journal article supplement (doi:10.1039/c9dt03584b), 2019-01-01
Supplement: c9dt03584b1.pdf [file c9dt03584b1.pdf]

**Electronic Supplementary Information**

**Metal  $\beta$ -diketonate Complexes as Highly Efficient Catalysts for Chemical Fixation of CO<sub>2</sub> into Cyclic Carbonates in Mild Conditions**

Hongmei Wang, Zulei Zhang, Hailong Wang, Liping Guo\* and Lei Li\*

College of Biological, Chemical Science and Engineering, Jiaxing 314001, China. Email: guolp@mail.zjxu.edu.cn; lei.li@mail.zjxu.edu.cn

**Table S1** Representative catalysts for cyclic carbonate synthesis at 1 atm of CO<sub>2</sub>

| entry | Catalyst<br>(loading)                                                                          | Cocatalyst<br>(loading) | Substrate                 | Temp<br>(°C) | Time<br>(h) | Yield<br>(%) | TOF <sup>a</sup><br>(h <sup>-1</sup> ) | Catalyst Type                          | Ref. |
|-------|------------------------------------------------------------------------------------------------|-------------------------|---------------------------|--------------|-------------|--------------|----------------------------------------|----------------------------------------|------|
| 1     | 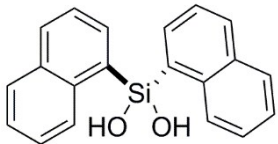<br>(10 mol%) | TBAB<br>(10 mol%)       | Styrene Oxide (SO)        | 60           | 14          | 95           | 0.68                                   | The hydrogen-bond donor, ammonium salt | 1    |
| 2     | <br>(8 mol%)  | TBAI<br>(8 mol%)        | 1, 2-Propylene Oxide (PO) | 25           | 20          | 86           | 0.54                                   | The hydrogen-bond donor, ammonium salt | 2    |
| 3     | Calix[4]pyrroles<br>(3 mol%)                                                                   | TBAI<br>(3 mol%)        | 1, 2-Hexene Oxide (HO)    | 75           | 6           | 56           | 3.1                                    | The hydrogen-bond donor, ammonium salt | 3    |
| 4     | <br>(2 mol%) | /                       | PO                        | rt           | 24          | 42           | 0.88                                   | Functionalized ammonium salt           | 4    |
| 5     |             | /                       | 1, 2-Butene Oxide (BO)    | 50           | 6           | 92           | 3.1                                    | Functionalized ammonium salt           | 5    |

|    |                                                                                                            |   |                                  |    |    |                      |                   |                                                      |    |
|----|------------------------------------------------------------------------------------------------------------|---|----------------------------------|----|----|----------------------|-------------------|------------------------------------------------------|----|
| 6  | (5 mol%)<br>Multifunctional Organocatalysts<br>(4 mol%)                                                    | / | BO                               | rt | 24 | 87                   | 0.91              | Functionalized ammonium salt                         | 6  |
| 7  | Dual-IL system [TMGH+][<br>O2MMIm+][Br-]<br>(25 mol%)                                                      | / | Epichlorohydrin (ECH)            | 30 | 12 | 89                   | 0.30              | Functionalized ammonium salt                         | 7  |
| 8  | ChCl/urea<br>(100mg ( about 0.406 mmol ) for 0.2<br>mmol epoxide)                                          | / | N-benzyl spiro-<br>epoxyoxindole | 40 | 5  | 49                   | 0.098             | Functionalized ammonium salt                         | 8  |
| 9  | SO <sub>2</sub> -supported imidazolium halides (25<br>mol%)                                                | / | BO                               | 80 | 1  | Conv.99%<br>Sel. 94% | 3.7               | Functionalized ammonium salt                         | 9  |
| 10 | MIL-101-IP<br>(50 mg for 1 g epoxide)                                                                      | / | BO                               | 25 | 48 | 95                   | 0.40 <sup>b</sup> | Functionalized ammonium salt,<br>Porous materials    | 10 |
| 11 | Bifunctional Metal-Free Porous Organic<br>Framework POF-PNA-Br <sup>-</sup><br>(50 mg for 30 mmol epoxide) | / | BO                               | 40 | 48 | 91.7                 | 0.82              | Functionalized ammonium salt,<br>Porous materials    | 11 |
| 12 | Porous Ionic Polymers PIP-Bn-Cl<br>(25 mg for 1 g epoxide)                                                 | / | BO                               | 50 | 24 | 94.5                 | 1.6 <sup>b</sup>  | Functionalized phosphonium salt,<br>Porous materials | 12 |
| 13 | 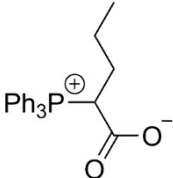                        | / | PO                               | 25 | 6  | 90                   | 3                 | Functionalized phosphonium salt                      | 13 |

|    |                                                                                                 |                    |     |    |    |      |                   |                               |    |  |
|----|-------------------------------------------------------------------------------------------------|--------------------|-----|----|----|------|-------------------|-------------------------------|----|--|
|    | (5 mol%)                                                                                        |                    |     |    |    |      |                   |                               |    |  |
| 14 | Hierarchically Mesoporous o-Hydroxyazobenzene Polymers:Zn/HAzo-POP-1<br>(18mg for 12.5 mmol PO) | TBAB<br>(7.2 mol%) | PO  | 25 | 48 | >99  | 0.29 <sup>c</sup> | Metal Porous materials        | 14 |  |
| 15 | Hierarchical Bipyridine-Constructed Framework Cu/POP-Bpy<br>(0.5 mol%)                          | TBAB<br>(7 mol%)   | BO  | 29 | 48 | 99   | 4.1               | Metal Porous materials        | 15 |  |
| 16 | Porous iron-phosphonate nanomaterial: HPFP-1<br>(50 mg for 5 mmol)                              | TBAB<br>(5 mol%)   | PO  | rt | 10 | 87   | 1.7 <sup>c</sup>  | Metal Porous materials        | 16 |  |
| 17 | Mixed Ligand Zn(II) MOFs<br>(1.8 mol%)                                                          | TBAB<br>(1.8 mol%) | PO  | 40 | 8  | 99   | 6.9               | Metal–Organic Frameworks      | 17 |  |
| 18 | Amide-functionalized heterometallic helicate cages<br>(0.125 mol%)                              | TBAB<br>(3.6 mol%) | ECH | rt | 24 | 83   | 27.7              | Functionalized metal compound | 18 |  |
| 19 | YCl <sub>3</sub><br>(1 mol%)                                                                    | TBAB<br>(2 mol%)   | BO  | 22 | 5  | 38   | 7.6               | Metal salt                    | 19 |  |
| 20 | Fe(O <sub>2</sub> CNEt <sub>2</sub> ) <sub>3</sub><br>(1 mol%)                                  | TBAB<br>(2 mol%)   | BO  | 25 | 24 | 99   | 4.1               | Fe(III) carbamates            | 20 |  |
| 21 | Aluminum Porphyrin-based hyper-crosslinked polymers Al-HCP<br>(0.25 mol% )                      | TBAB<br>(2 mol%)   | PO  | 25 | 5  | 99   | 79.2              | Functionalized metal complex  | 21 |  |
| 22 | Salen-Cu(II)@MIL-101(Cr) (6.39 mol% of Cu)                                                      | TBAB<br>(100 mol%) | PO  | 25 | 48 | 82.8 | 0.27              | Functionalized metal complex  | 22 |  |
|    | Bimetallic Aluminium–Salen                                                                      | TBAB               |     |    |    |      |                   |                               |    |  |

|    |                                                      |                    |                      |     |    |                             |      |                                 |                      |
|----|------------------------------------------------------|--------------------|----------------------|-----|----|-----------------------------|------|---------------------------------|----------------------|
|    | Complexes<br>(2.5 mol%)                              | (2.5 mol%)         |                      |     |    |                             |      |                                 |                      |
| 24 | Dinuclear cobalt complexes<br>(0.1 mol%)             | TBAB<br>(0.1 mol%) | ECH                  | 120 | 3  | 73                          | 243  | Metal complex                   | 24                   |
| 25 | Bifunctional aluminium catalyst<br>(5 mol%)          | /                  | BO                   | 35  | 24 | Yield<br>73% (conv<br>.92%) | 1.5  | Functionalized metal<br>complex | 25                   |
| 26 | supported aluminium(salen) complexes<br>(0.25 mol %) | /                  | butyl glycidyl ether | 50  | 24 | 80                          | 13.3 | Functionalized metal<br>complex | 26                   |
| 27 | Al(III)@cage<br>(1mol% of Al)                        | TBAB<br>(10 mol%)  | PO                   | 25  | 48 | 58                          | 1.2  | Functionalized metal<br>complex | 27                   |
|    | Co(III)@cage<br>(1mol% of Co)                        |                    | SO                   |     | 24 | 99                          | 4.1  |                                 |                      |
|    |                                                      |                    | BO                   | 40  | 8  | 97                          | 24.2 |                                 |                      |
| 28 | Co(acac) <sub>2</sub><br>(0.5 mol%)                  | TBAI<br>(2.5 mol%) | PO                   | 40  | 8  | 97                          | 24.2 | Metal complex                   | <b>This<br/>work</b> |
|    |                                                      |                    | HO                   | 70  | 4  | 99                          | 49.5 |                                 |                      |
|    | Co(acac) <sub>2</sub><br>(0.1 mol%)                  | TBAI<br>(0.5 mol%) | BO                   | 40  | 8  | 41                          | 51.2 |                                 |                      |

<sup>a</sup> Measured in mole of epoxide consumed/mol catalyst per hour; <sup>b</sup> Measured in g/(g·h); <sup>c</sup> Calculated by cocatalyst.

## Reference

1. A. M. Hardman-Baldwin and A. E. Mattson, *Chemsuschem*, 2014, **7**, 3275.
2. L. Wang, G. Zhang, K. Kodama and T. Hirose, *Green Chem.*, 2016, **18**, 1229.
3. C. Maeda, S. Sasaki, K. Takaishi and T. Ema, *Catal. Sci. Technol.*, 2018, **8**, 4193.
4. M. Hong, Y. Kim, H. Kim, H. J. Cho, M.-H. Baik and Y. Kim, *J. Org. Chem.*, 2018, **83**, 9370.
5. A. Rostami, M. Mahmoodabadi, A. H. Ebrahimi, H. Khosravi and A. Al-Harrasi, *Chemsuschem*, 2018, **11**, 4262.
6. N. Liu, Y. F. Xie, C. Wang, S. J. Li, D. H. Wei, M. Li and B. Dai, *Acs Catalysis*, 2018, **8**, 9945.
7. J. Hu, J. Ma, H. Liu, Q. Qian, C. Xie and B. Han, *Green Chem.*, 2018, **20**, 2990.
8. R. K. Tak, P. Patel, S. Subramanian, R. I. Kureshy and N. U. H. Khan, *Acs Sustainable Chem. Eng.*, 2018, **6**, 11200.
9. O. Martinez-Ferrate, G. Chacon, F. Bernardi, T. Grehl, P. Bruner and J. Dupont, *Catal. Sci. Technol.*, 2018, **8**, 3081.
10. B. Aguila, Q. Sun, X. Wang, E. O'Rourke, A. M. Al-Enizi, A. Nafady and S. Ma, *Angew. Chem. Int. Ed.*, 2018, **57**, 10107.
11. D. X. Ma, K. Liu, J. X. Li and Z. Shi, *Acs Sustainable Chem. Eng.*, 2018, **6**, 15050.
12. Q. Sun, Y. Y. Jin, B. Aguila, X. J. Meng, S. Q. Ma and F. S. Xiao, *Chemsuschem*, 2017, **10**, 1160.
13. H. Zhou, G.-X. Wang, W.-Z. Zhang and X.-B. Lu, *ACS Catalysis*, 2015, **5**, 6773.
14. G. Ji, Z. Yang, H. Zhang, Y. Zhao, B. Yu, Z. Ma and Z. Liu, *Angew. Chem. Int. Ed.*, 2016, **55**, 9685.
15. Z. F. Dai, Q. Sun, X. L. Liu, L. P. Guo, J. X. Li, S. X. Pan, C. Q. Bian, L. Wang, X. Hu, X. J. Meng, L. H. Zhao, F. Deng and F. S. Xiao, *Chemsuschem*, 2017, **10**, 1186.
16. S. Ghosh, P. Bhanja, N. Salam, R. Khatun, A. Bhaumik and S. M. Islam, *Catal. Today*, 2018, **309**, 253.
17. P. Patel, B. Parmar, R. I. Kureshy, N. U. Khan and E. Suresh, *Chemcatchem*, 2018, **10**, 2401.
18. L. Wang, R. L. Zhang, Q. X. Han, C. Xu, W. M. Chen, H. Yang, G. S. Gao, W. W. Qin and W. S. Liu, *Green Chem.*, 2018, **20**, 5311.
19. A. Barthel, Y. Saih, M. Gimenez, J. D. A. Pelletier, F. E. Kuhn, V. D'Elia and J. M. Basset, *Green Chem.*, 2016, **18**, 3116.
20. G. Bresciani, M. Bortoluzzi, F. Marchetti and G. Pampaloni, *Chemsuschem*, 2018, **11**, 2737.
21. Y. Chen, R. C. Luo, Q. H. Xu, W. Y. Zhang, X. T. Zhou and H. B. Ji, *Chemcatchem*, 2017, **9**, 767.
22. C. Liu, X.-H. Liu, B. Li, L. Zhang, J.-G. Ma and P. Cheng, *J. Energy Chem.*, 2017, **26**, 821.
23. W. Clegg, R. W. Harrington, M. North and R. Pasquale, *Chem. Eur. J.*, 2010, **16**, 6828.
24. Z. A. K. Khattak, H. A. Younus, N. Ahmad, H. Ullah, S. Suleman, M. S. Hossain, M. Elkadig and F. Verpoort, *Chem. Commun.*, 2019, **55**, 8274.
25. F. de la Cruz-Martinez, J. Martinez, M. A. Gaona, J. Fernandez-Baeza, L. F. Sanchez-Barba, A. M. Rodriguez, J. A. Castro-Osma, A. Otero and A. Lara-Sanchez, *Acs Sustainable Chem. Eng.*, 2018, **6**, 5322.
26. P. A. Carvalho, J. W. Comerford, K. J. Lamb, M. North and P. S. Reiss, *Adv. Synth. Catal.*, 2019, **361**, 345.
27. C. K. Ng, R. W. Toh, T. T. Lin, H.-K. Luo, T. S. A. Hor and J. Wu, *Chem. Sci.*, 2019, **10**, 1549.
